# Supplementary material
Source: PubMed Central journal article supplement (PMC6759085)

**Immunity, Volume 50**

## **Supplemental Information**

### **Cell-Type-Specific Interleukin 1**

### **Receptor 1 Signaling in the Brain**

### **Regulates Distinct Neuroimmune Activities**

**Xiaoyu Liu, Daniel P. Nemeth, Daniel B. McKim, Ling Zhu, Damon J. DiSabato, Olimpia Berdysz, Gowthami Gorantla, Braedan Oliver, Kristina G. Witcher, Yufen Wang, Christina E. Negray, Rekha S. Vegesna, John F. Sheridan, Jonathan P. Godbout, Matthew J. Robson, Randy D. Blakely, Phillip G. Popovich, Staci D. Bilbo, and Ning Quan**

1 **Figure S1. Examination of IL-1R1 mRNA and Cre expression in cell-type specific Cre and**  
 2 **IL-1R1 lines. Related to Figure 1 and Figure 2.**

3 (A-B) Results of ISHH labeling of brain sections from WT (A) and *Il1r1<sup>tr</sup>* mice (B). IL-1R1  
 4 riboprobe labeling was found in the endothelial cells (A, left), choroid plexus cells (A, middle)  
 5 and ependymal cells (A, right) in the WT mice and was absent in the dentate gyrus (B, left),  
 6 choroid plexus cells (B, middle) and endothelial cells (B, right) in the *Il1r1<sup>tr</sup>* mice. Scale bar: 100  
 7  $\mu\text{m}$ . Dashed square marks the area shown at higher magnification on the bottom right.

8 (C) IHC labeling of DAPI, RFP and CD31 of hippocampal sections from WT mice. Scale bar:  
 9 100  $\mu\text{m}$ . RFP is not present in these mice without the knockin tdTomato.

10 (D-F) IHC labeling of the reporter for *Tie2-Cre* (D, middle), *Cx3cr1-Cre* (E, middle), and *Gfap-*  
 11 *Cre* (F, middle) with cell-type specific markers Ly6C (D, left), Iba1 (E, left) and GFAP (F, left) of  
 12 brain sections from *Tie2-Cre-R26tdT*, *Cx3cr1-Cre-R26tdT* and *Gfap-Cre-R26tdT* mice. Scale  
 13 bar for (D-E): 100  $\mu\text{m}$ . Scale bar for (F): 50  $\mu\text{m}$ .

14 (G-H) Representative tilescan images of tdTomato (G) and eGFP (H) labeling of hippocampus  
 15 sections from *Camk2a-Cre-R26tdT* and *Vglut2-Cre-R26tdT* mice. Scale bar: 200  $\mu\text{m}$ .

16 (I) IHC labeling of NeuN and RFP of brain sections from *Gfap-Cre-Il1r1<sup>tr</sup>* mice. Scale bar: 100  
 17  $\mu\text{m}$ .

18 (J) Representative tilescan images of RFP labeling of *Vglut2-Cre-Il1r1<sup>tr</sup>* hippocampal sections.  
 19 Scale bar: 200  $\mu\text{m}$ .

20 (K-L) Representative images of RFP labeling of brain sections from *Gfap-Cre-Il1r1<sup>tr</sup>* mice after  
 21 sham/IL-1 injections. Scale bar: 50  $\mu\text{m}$ .

22 (M) IHC labeling of Iba1 and RFP of hippocampal sections from *Cx3cr1-Cre-Il1r1<sup>tr</sup>* mice. Scale  
 23 bar: 100  $\mu\text{m}$ .

24 (N) IHC labeling of RFP, PDGFR $\beta$  and CD31 of brain sections from *Tie2-Cre-Il1r1<sup>tr</sup>* mice. Arrow  
 25 indicates a PDGFR $\beta$ -labeled pericyte cell body. Dashed square marks the area shown for RFP  
 26 and CD31 co-localization (top right) or RFP and PDGFR $\beta$  (bottom right) double labeled images  
 27 at higher magnification. Scale bar: 25  $\mu\text{m}$ .

28 (O) qPCR analysis of inflammatory genes in hippocampus samples of WT and *Tie2-Cre-*  
 29 *Il1r1<sup>tr</sup>COX-2<sup>tr</sup>* mice following ICV sham/IL-1 $\beta$  injections. n = 4 mice/genotype, [3 independent](#)  
 30 [experiments](#).

31 Error bars represent the mean  $\pm$  SEM. Means with asterisk (\*) are significantly different from the  
 32 corresponding control group ( $p < 0.05$ ) according to *F*-protected post hoc analysis.

33  
 34 **Figure S2. eIL-1R1 and nIL-1R1 cause distinct neuroinflammatory responses. Related to**  
 35 **Figure 3.**

36 (A) Representative images of CD45 and Iba1 labeling on injection side of DG sections from WT,  
 37 *Il1r1<sup>tr</sup>*, *Tie2-Cre-Il1r1<sup>tr</sup>* and *Vglut2-Cre-Il1r1<sup>tr</sup>* mice 6 days after high dose ad-ssIL-1 injections.  
 38 Dashed square marks the area shown at higher magnification on the bottom right. Scale bar:  
 39 100  $\mu\text{m}$ .

40 (B-C) Quantification of Iba1 proportional area (B) and CD45<sup>+</sup> cells (C) on injection side and  
 41 contralateral side of DG sections from WT, *Il1r1<sup>tr</sup>*, *Tie2-Cre-Il1r1<sup>tr</sup>* and *Vglut2-Cre-Il1r1<sup>tr</sup>* mice 6  
 42 days after ad-ssIL-1 injections. n = 4 mice/genotype, [2 independent experiments](#).

43 (D) Representative images of CD45 and Iba1 labeling on injection side of DG sections from WT,  
 44 *Il1r1<sup>tr</sup>*, *Tie2-Cre-Il1r1<sup>tr</sup>* and *Vglut2-Cre-Il1r1<sup>tr</sup>* mice 6 days after low dose ad-ssIL-1 injections.  
 45 Dashed square marks the area shown at higher magnification on the bottom right. Scale bar:  
 46 100  $\mu\text{m}$ .

47 (E) Quantification of Iba1 proportional area on injection side and contralateral side of DG  
 48 sections from WT, *Il1r1<sup>tr</sup>*, *Tie2-Cre-Il1r1<sup>tr</sup>* and *Vglut2-Cre-Il1r1<sup>tr</sup>* mice 6 days after ad-ssIL-1  
 49 injections. n = 4 mice/genotype, [2 independent experiments](#).

50 Error bars represent the mean  $\pm$  SEM. Means with asterisk (\*) are significantly different from the  
 51 corresponding control group ( $p < 0.05$ ) according to *F*-protected post hoc analysis.

**Figure S3. Microglial activation and leukocyte recruitment occur independently in response to IL-1. Related to Figures 4-6.**

(A-E) Influence of leukocyte depletion by vinblastine/cyclophosphamide on central IL-1 induced microglial morphological alterations. (F-H) Influence of microglia depletion by PLX on central IL-1 induced leukocyte recruitment.

(A) Representative images of CD45 and Iba1 labeling of hippocampus sections from saline, vinblastine or cyclophosphamide treated WT mice 24 h after ICV IL-1 $\beta$  injections. Scale bar: 100  $\mu$ m.

(B-D) Quantification of Iba1 proportional area (B), average microglial total process length (C), and microglial soma size (D) in DG sections from saline, vinblastine or cyclophosphamide treated WT mice 24 h after ICV IL-1 $\beta$  injections. n = 4-5 mice/genotype, 3 independent experiments.

(E) Quantification of parenchymal CD45<sup>+</sup> cell number in the DG sections from saline, vinblastine or cyclophosphamide treated WT mice 24 h after ICV IL-1 $\beta$  injections. n = 4 mice/group, 3 independent experiments.

(F) Quantification of parenchymal Iba1<sup>+</sup> cell number in brain sections from PLX treated WT mice after ICV IL-1 $\beta$  injections. n = 4 mice/group, 2 independent experiments.

(G) Cell counts of microglia and infiltrating leukocytes in the brain by FACS analyses. n = 3 mice/group, 2 independent experiments.

(H) Representative images of CD45 and Iba1 labeling of brain sections from PLX treated WT mice 24 h after ICV sham/IL-1 $\beta$  injection. Scale bar: 100  $\mu$ m.

Error bars represent the mean  $\pm$  SEM. Means with asterisk (\*) are significantly different from the corresponding control group ( $p < 0.05$ ) according to *F*-protected post hoc analysis. Vinbl, vinblastine; Cyclo, cyclophosphamide.

**Figure S4. Influence of depletion of circulating leukocytes on microglial morphology and influence of depletion of brain microglia on leukocyte trafficking. Related to Figures 4-6.**

(A) Representative flow bivariate dot plots of CD11b, Ly6C and Ly6G labeling on enriched blood monocytes and neutrophils from saline, vinblastine or cyclophosphamide treated WT mice.

(B) Cell counts of total leukocytes, CD11b<sup>+</sup>Ly6G<sup>+</sup>Ly6C<sup>int</sup> neutrophils and CD11b<sup>+</sup>Ly6G<sup>+</sup>Ly6C<sup>hi</sup> monocytes in the blood from saline, vinblastine or cyclophosphamide treated WT mice. n = 4 mice/group, 4 independent experiments.

(C) Representative images of CD45 and Iba1 labeling of the hippocampus sections from saline, vinblastine or cyclophosphamide treated mice which received sham injections. Scale bar: 100  $\mu$ m.

(D-E) Quantification of Iba1 proportional area of medial orbital cortex (D) and septal area (E) sections from saline, vinblastine or cyclophosphamide treated WT mice which received sham/IL-1 $\beta$  injections. n = 4 mice/group, 3 independent experiments.

(F) Cell counts of whole brain monocytes, lymphocytes and neutrophils by flow cytometry in PLX or control diet treated WT mice after saline or LPS injections. n = 6-8 mice/group. SAL, saline, 2 independent experiments.

Error bars represent the mean  $\pm$  SEM. Means with asterisk (\*) are significantly different from the corresponding control group ( $p < 0.05$ ) according to *F*-protected post hoc analysis.

**Figure S5. Mechanistic study of central IL-1 induced leukocyte infiltration. Related to Figure 4.**

(A) Schematic of the generation of *Il1r1<sup>fl/r</sup>* bone marrow chimera (BM<sup>*Il1r1<sup>fl/r</sup>→Il1r1<sup>fl/r</sup>*</sup> and BM<sup>*Il1r1<sup>fl/r</sup>→Tie2-Cre-Il1r1<sup>fl/r</sup>*</sup> mice.

1 (B) IHC labeling of Iba1 and CD45 of brain sections from BM<sup>Il1r1<sup>tr/tr</sup>→Il1r1<sup>tr/tr</sup></sup> and BM<sup>Il1r1<sup>tr/tr</sup>→Tie2-Cre-Il1r1<sup>tr/tr</sup></sup>  
 2 mice 24 h after ICV IL-1 $\beta$  injections. Dashed square marks the area shown at higher  
 3 magnification on the top left. Scale bar: 50  $\mu$ m.  
 4 (C) Ratio of infiltrating CD11b<sup>+</sup>CD45<sup>+</sup> leukocytes relative to numbers of microglia in whole brains  
 5 from BM<sup>Il1r1<sup>tr/tr</sup>→Il1r1<sup>tr/tr</sup></sup> and BM<sup>Il1r1<sup>tr/tr</sup>→Tie2-Cre-Il1r1<sup>tr/tr</sup></sup> mice. n = 4 mice/genotype, [2 independent](#)  
 6 [experiments](#).  
 7 (D) IHC labeling of CD45 and CD31 of hippocampal sections from ICV IL-1 $\beta$  injected WT, *Tie2-*  
 8 *Cre-Il1r1<sup>tr/tr</sup>* and *Tie2-Cre-Il1r1<sup>ff/ff</sup>* mice. Scale bar: 100  $\mu$ m.  
 9 (E) IHC labeling of RFP, GFAP, Iba1, CD31 and CD206 of brain sections from CCL2RFP<sup>flox</sup>  
 10 mice after ICV sham/IL-1 $\beta$  injections. Dashed square marks the area shown at higher  
 11 magnification on the bottom right. An orthogonal view of each higher magnification, double-  
 12 labeled, z-stack image is presented on the far right. White lines represent vertical or horizontal  
 13 optical cuts through the stack. Scale bar for top three panels: 100  $\mu$ m. Scale bar for bottom  
 14 three panels: 50  $\mu$ m.  
 15 (F) Relative CCL2 mRNA levels of brain tissues from WT mice after PLX treatment and the rest  
 16 mouse lines 3 h following ICV IL-1 $\beta$  injections, complementary to IL-1R1 lines shown in Figure  
 17 5F. n = 4-5 mice/genotype, [3 independent experiments](#).  
 18 Error bars represent the mean  $\pm$  SEM. Means with different letters (a, b, c, d) show groups that  
 19 are significantly different ( $p < 0.05$ ) according to *F*-protected post hoc analysis.

20  
 21 **Figure S6. Central IL-1 induces CAM expression in IL-1R1<sup>+</sup>/IL-1R1<sup>-</sup> endothelial and**  
 22 **ependymal cells. Related to Figure 5.**

23 (A-B) IHC labeling of RFP (A-B), ICAM-1 (A) and VCAM-1 (B) of brain sections from *Il1r1<sup>GR/GR</sup>*  
 24 mice after ICV IL-1 $\beta$  injections. Scale bar: 100  $\mu$ m.  
 25 (C) Quantification of RFP and ICAM/VCAM colocalization of brain sections from *Il1r1<sup>GR/GR</sup>* mice  
 26 after ICV IL-1 $\beta$  injections. n = 3 mice/group, [2 independent experiments](#).  
 27 (D-E) Representative tilescan images of VCAM-1 (D) and ICAM-1 (E) labeling of brain sections  
 28 from WT, *Tie2-Cre-Il1r1<sup>tr/tr</sup>* and *Tie2-Cre-Il1r1<sup>ff/ff</sup>* mice after sham/IL-1 $\beta$  injections. Arrows point to  
 29 ICAM expression in endepymal cells at the lateral ventricle. Scale bar: 200  $\mu$ m.

30  
 31 **Figure S7. Cell-type specific IL-1R1s mediate changes in microglial morphology and gene**  
 32 **expressions. Related to Figure 6.**

33 (A-B) Quantification of average microglial total process length (A) and Iba1<sup>+</sup> cell density (B) of  
 34 DG sections from cell-type specific IL-1R1 lines 24 h after ICV IL-1 $\beta$  injections. n = 4-5  
 35 mice/genotype, [5 independent experiments](#).  
 36 (C) qPCR analysis of NOS2 in hippocampus samples of cell-type specific IL-1R1 lines and PLX  
 37 treated WT mice 3 h following ICV sham/IL-1 $\beta$  injections. n = 4-5 mice/genotype, [6 independent](#)  
 38 [experiments](#).  
 39 (D) qPCR analysis of inflammatory genes in of *Il1r1<sup>ff/ff</sup>*, *Tie2-Cre-Il1r1<sup>ff/ff</sup>* and *Gfap-Cre-Il1r1<sup>ff/ff</sup>* mice  
 40 3 h following ICV sham/IL-1 $\beta$  injections. n = 4 mice/genotype, [4 independent experiments](#).  
 41 (E) IHC labeling of RFP and GFAP of striatum sections from ICV IL-1 $\beta$  injected AAVCre-*Il1r1<sup>tr/tr</sup>*  
 42 mice. Dashed square marks the area shown at higher magnification on the bottom. Scale bar:  
 43 100  $\mu$ m.  
 44 (F) IL-6 mRNA levels of sham injected, control side (AAVGFP) and aIL-1R1 KO side (AAVCre)  
 45 striatum in AAVCre-*Il1r1<sup>ff/ff</sup>* mice. n = 4-5 mice/genotype, [1 independent experiment](#).  
 46 (G-H) Quantification of mean fluorescence intensity (MFI) of CD86 (G) and CD11b (H) in  
 47 microglia from ICV IL-1 $\beta$  injected WT, *Tie2-Cre-Il1r1<sup>tr/tr</sup>* and *Tie2-Cre-Il1r1<sup>ff/ff</sup>* mice by flow  
 48 cytometric analysis. n = 4 mice/per genotype, [4 independent experiments](#).  
 49 Error bars represent the mean  $\pm$  SEM. Means with different letters (a, b, c, d) or means with  
 50 asterisk (\*) show groups that are significantly different ( $p < 0.05$ ) according to *F*-protected post  
 51 hoc analysis.

Figure S1

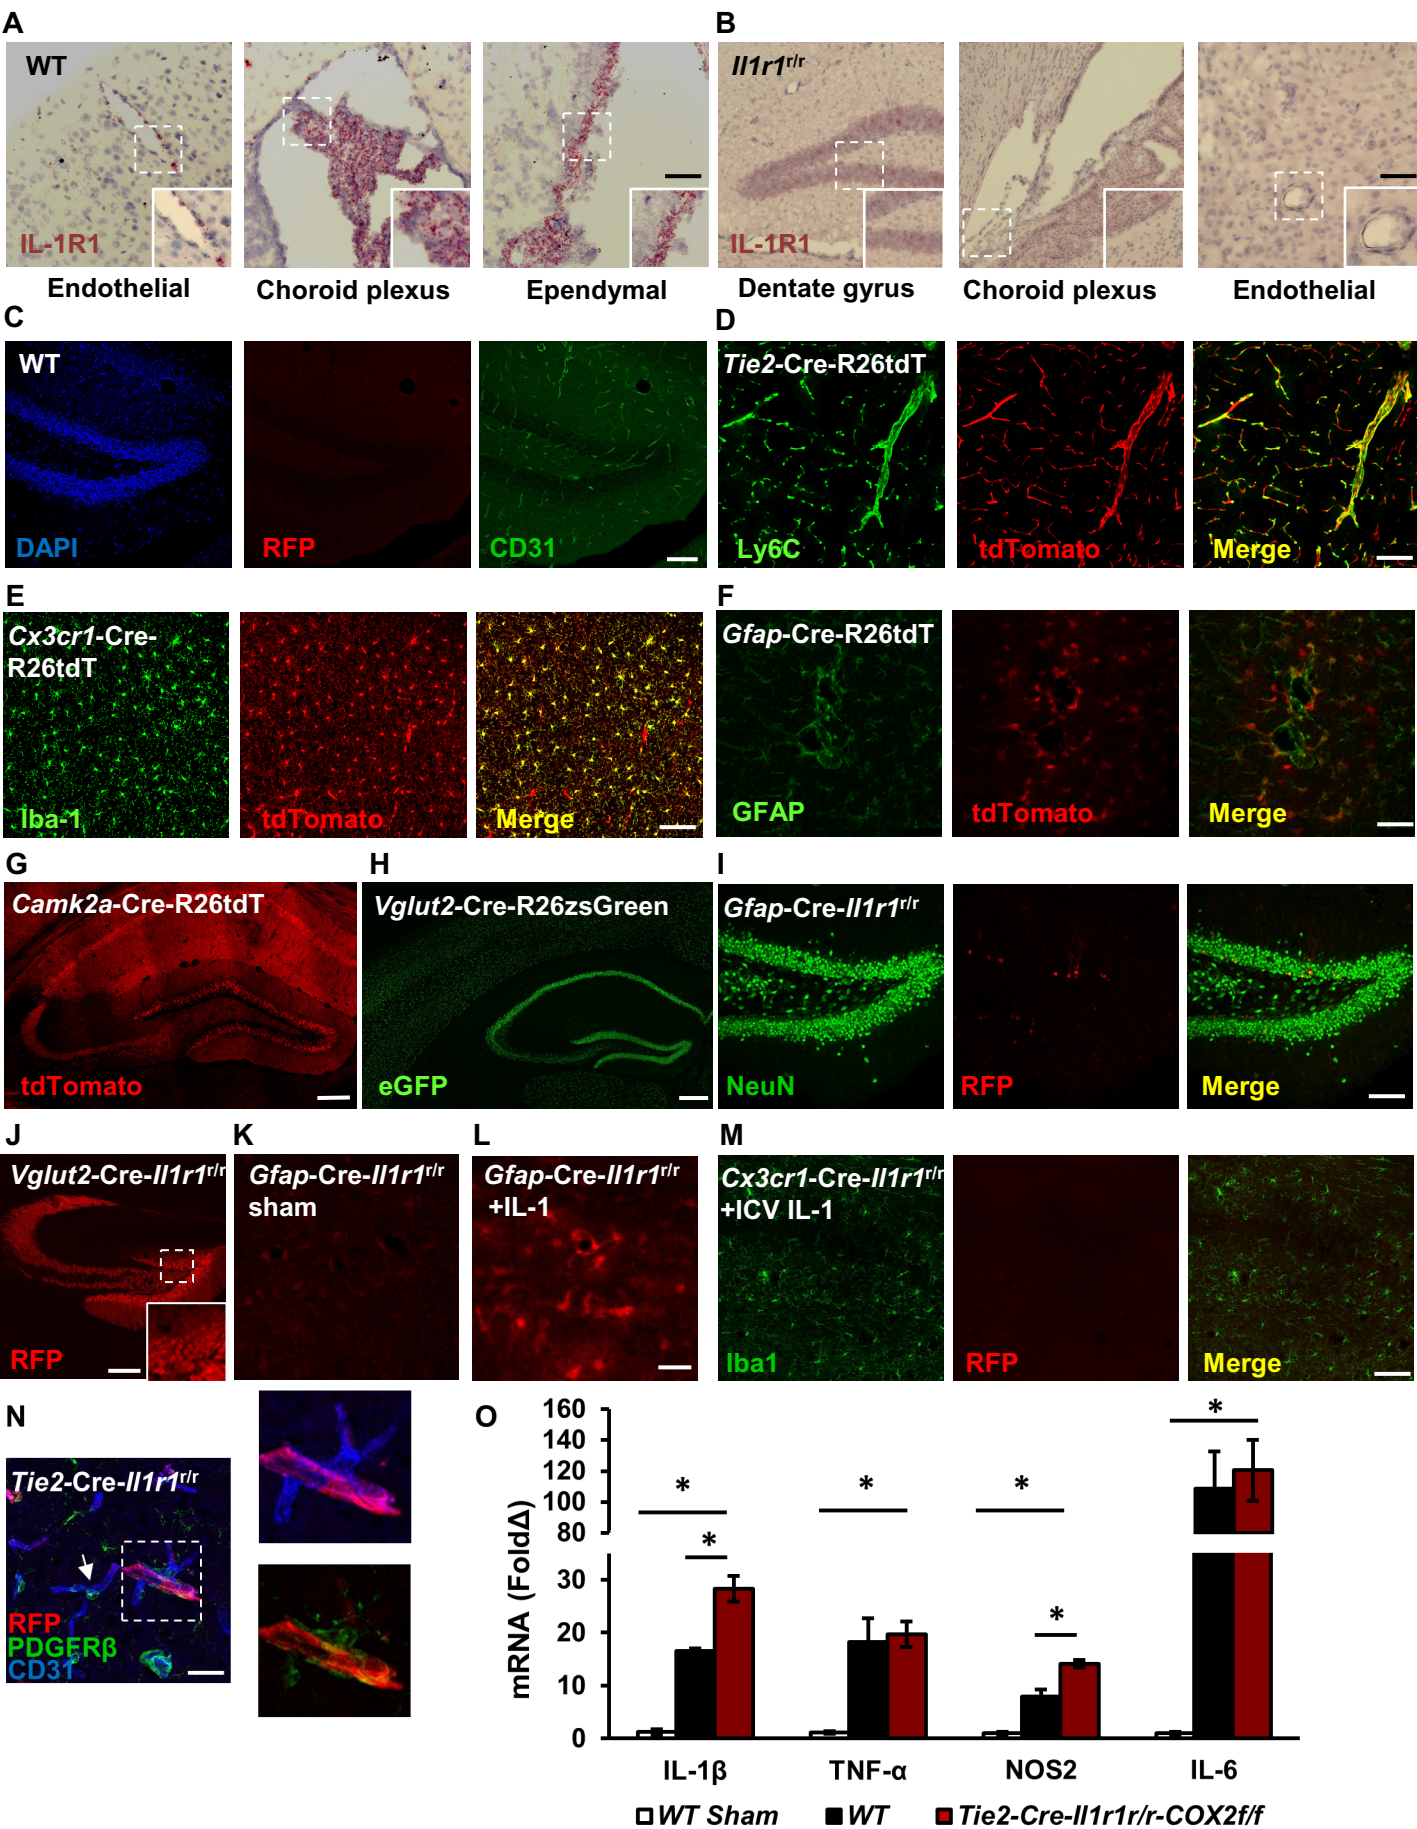

Figure S2

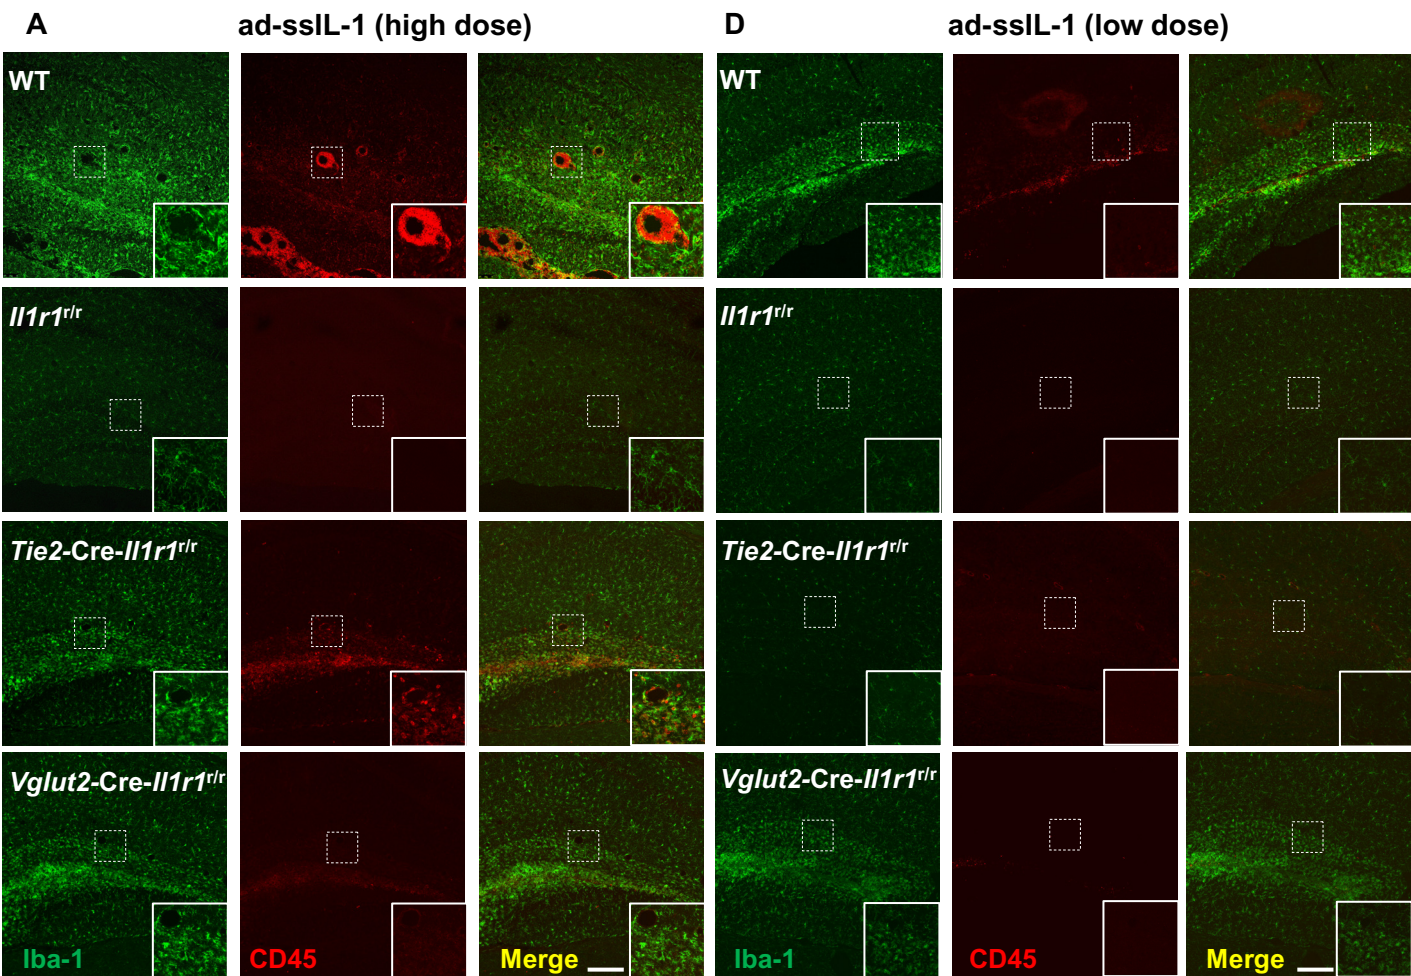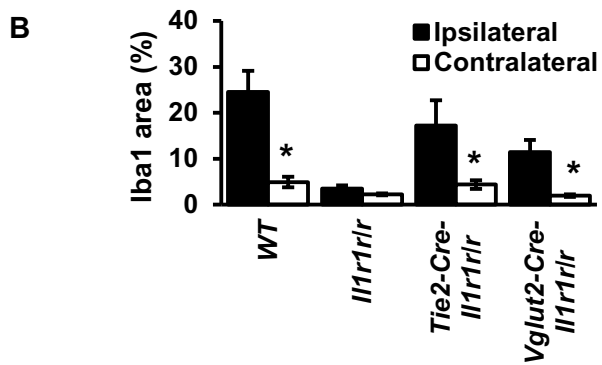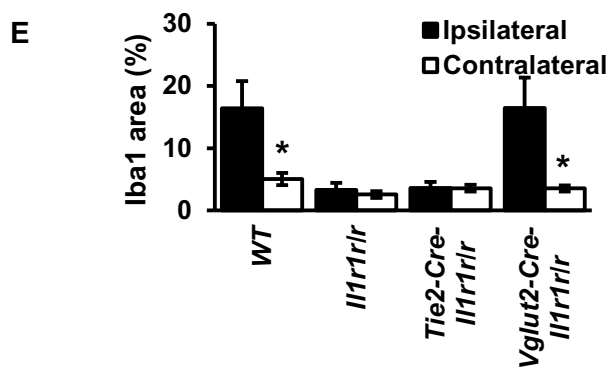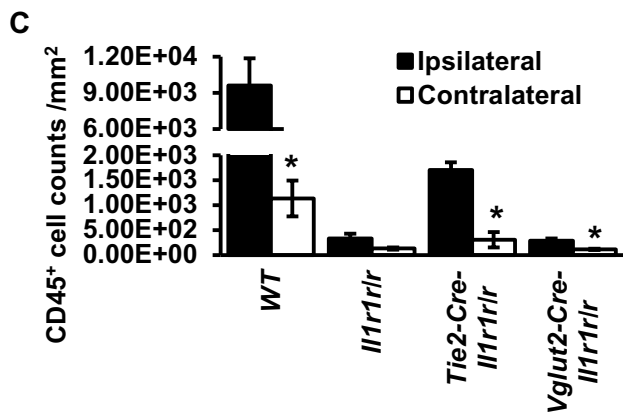

Figure S3

A

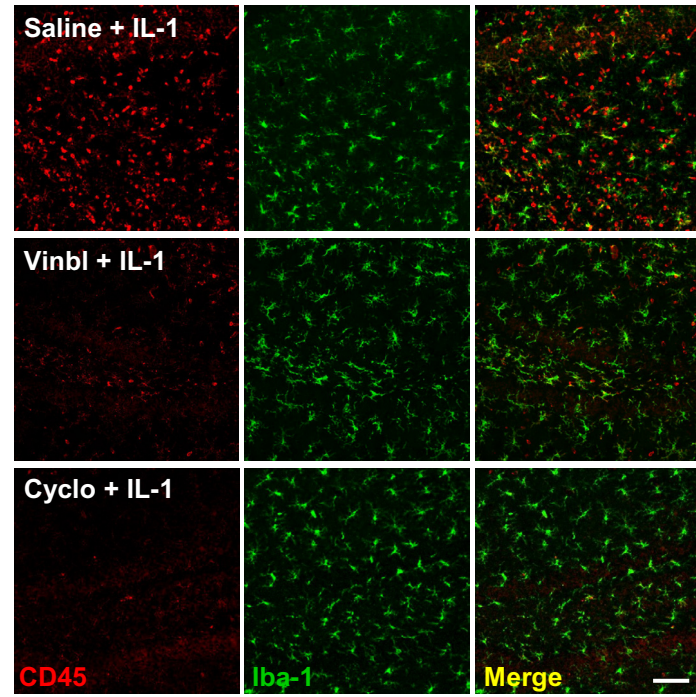

B

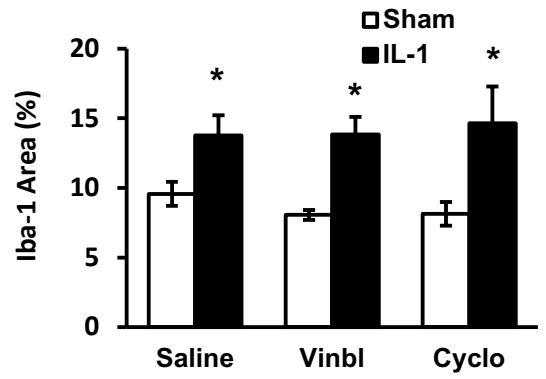

C

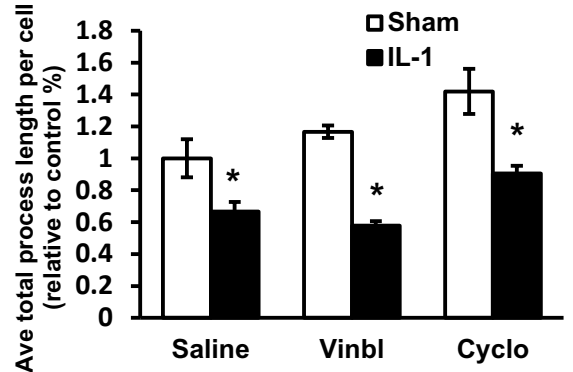

D

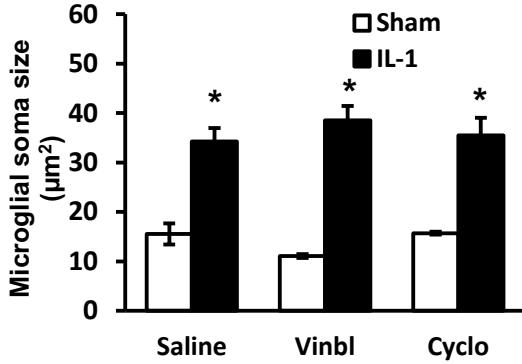

E

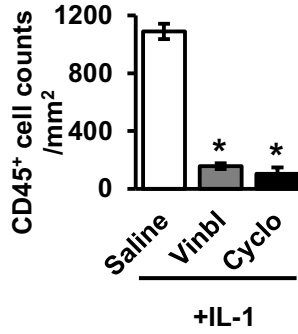

F

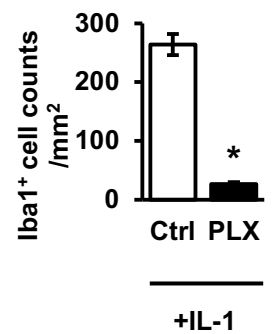

G

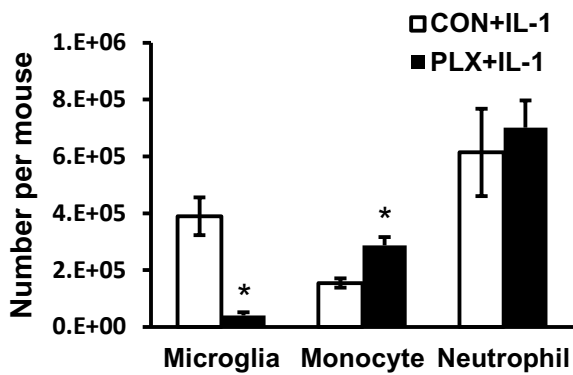

H

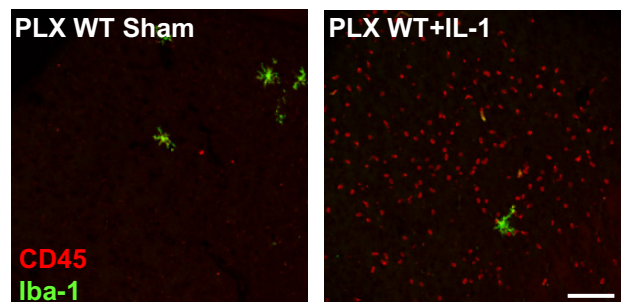

**Figure S4**

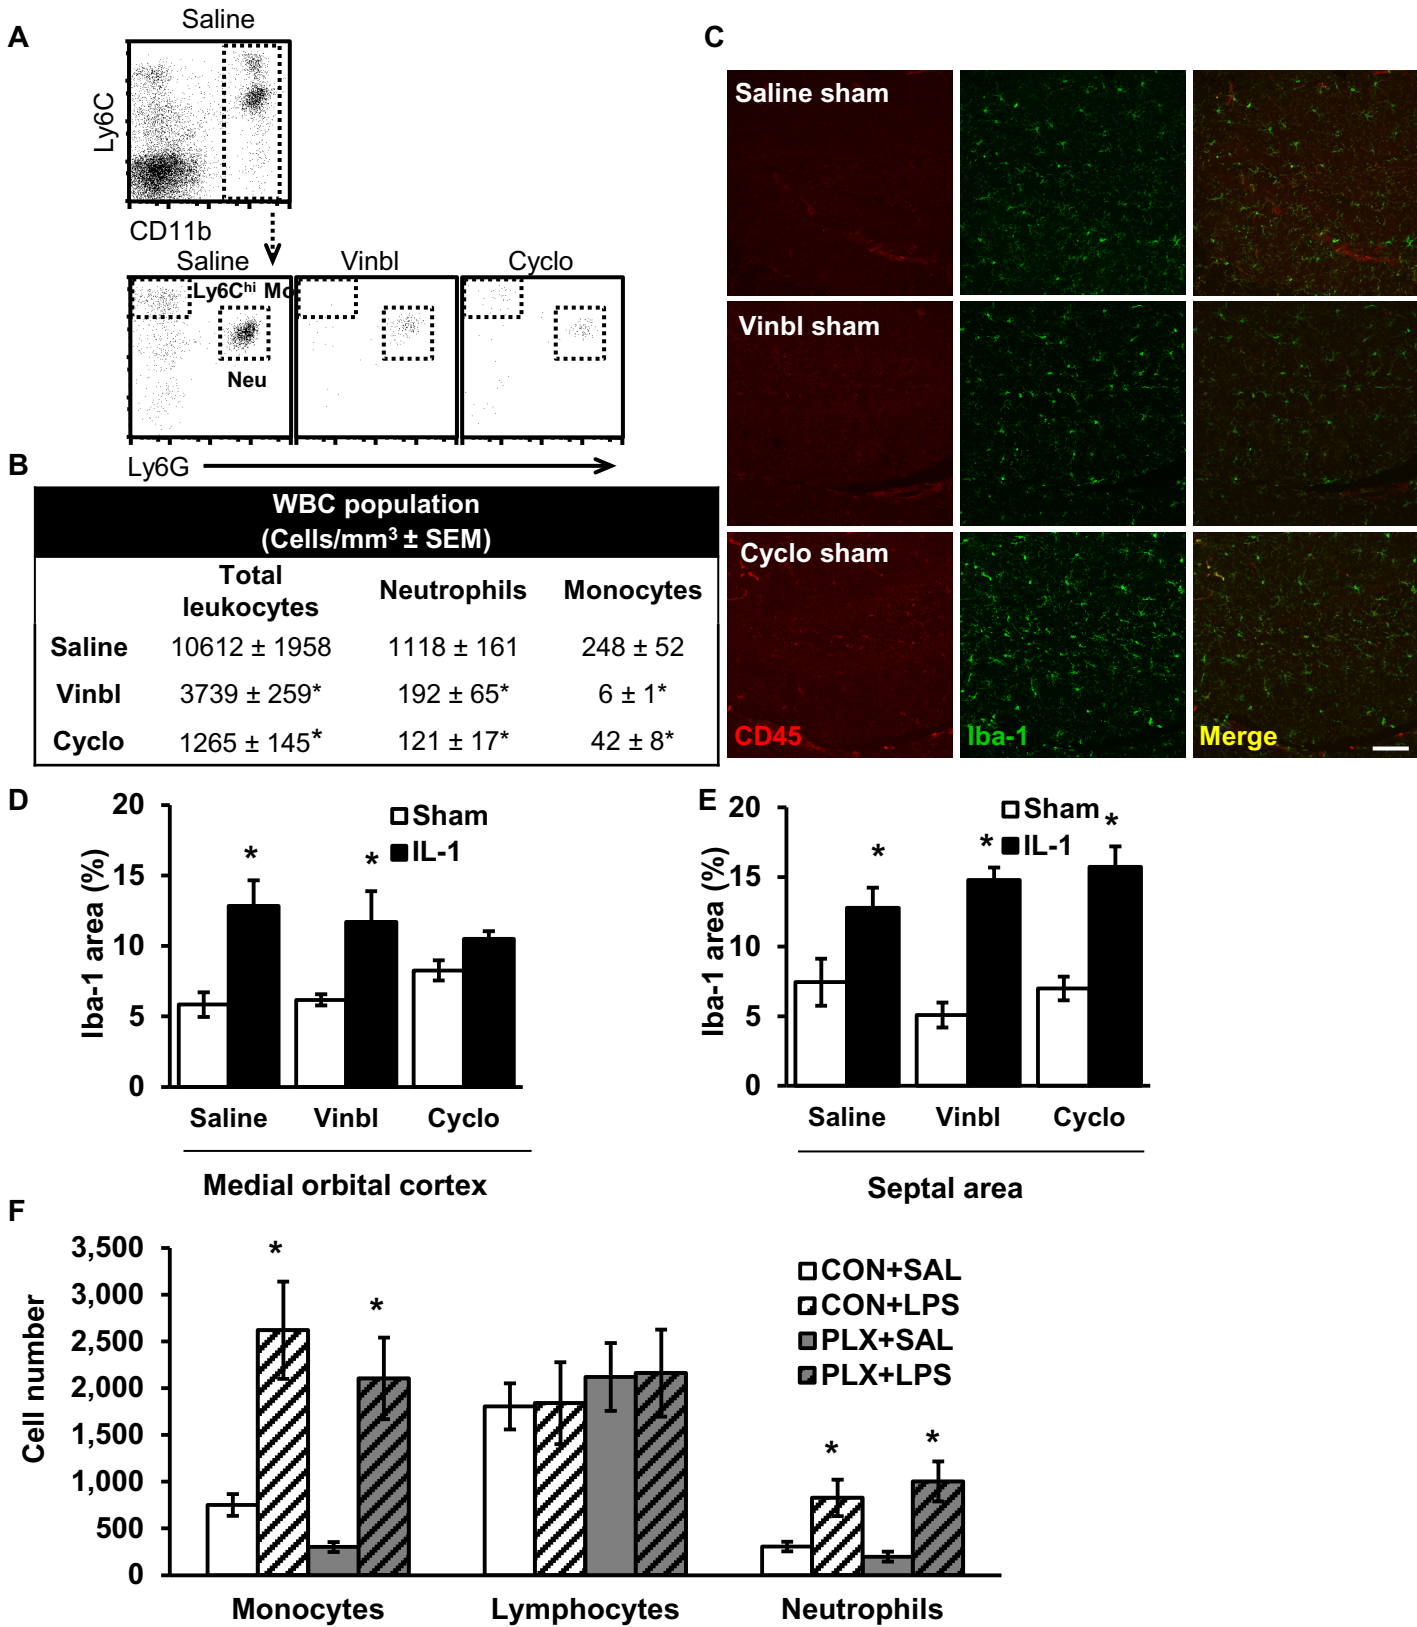



Figure S5

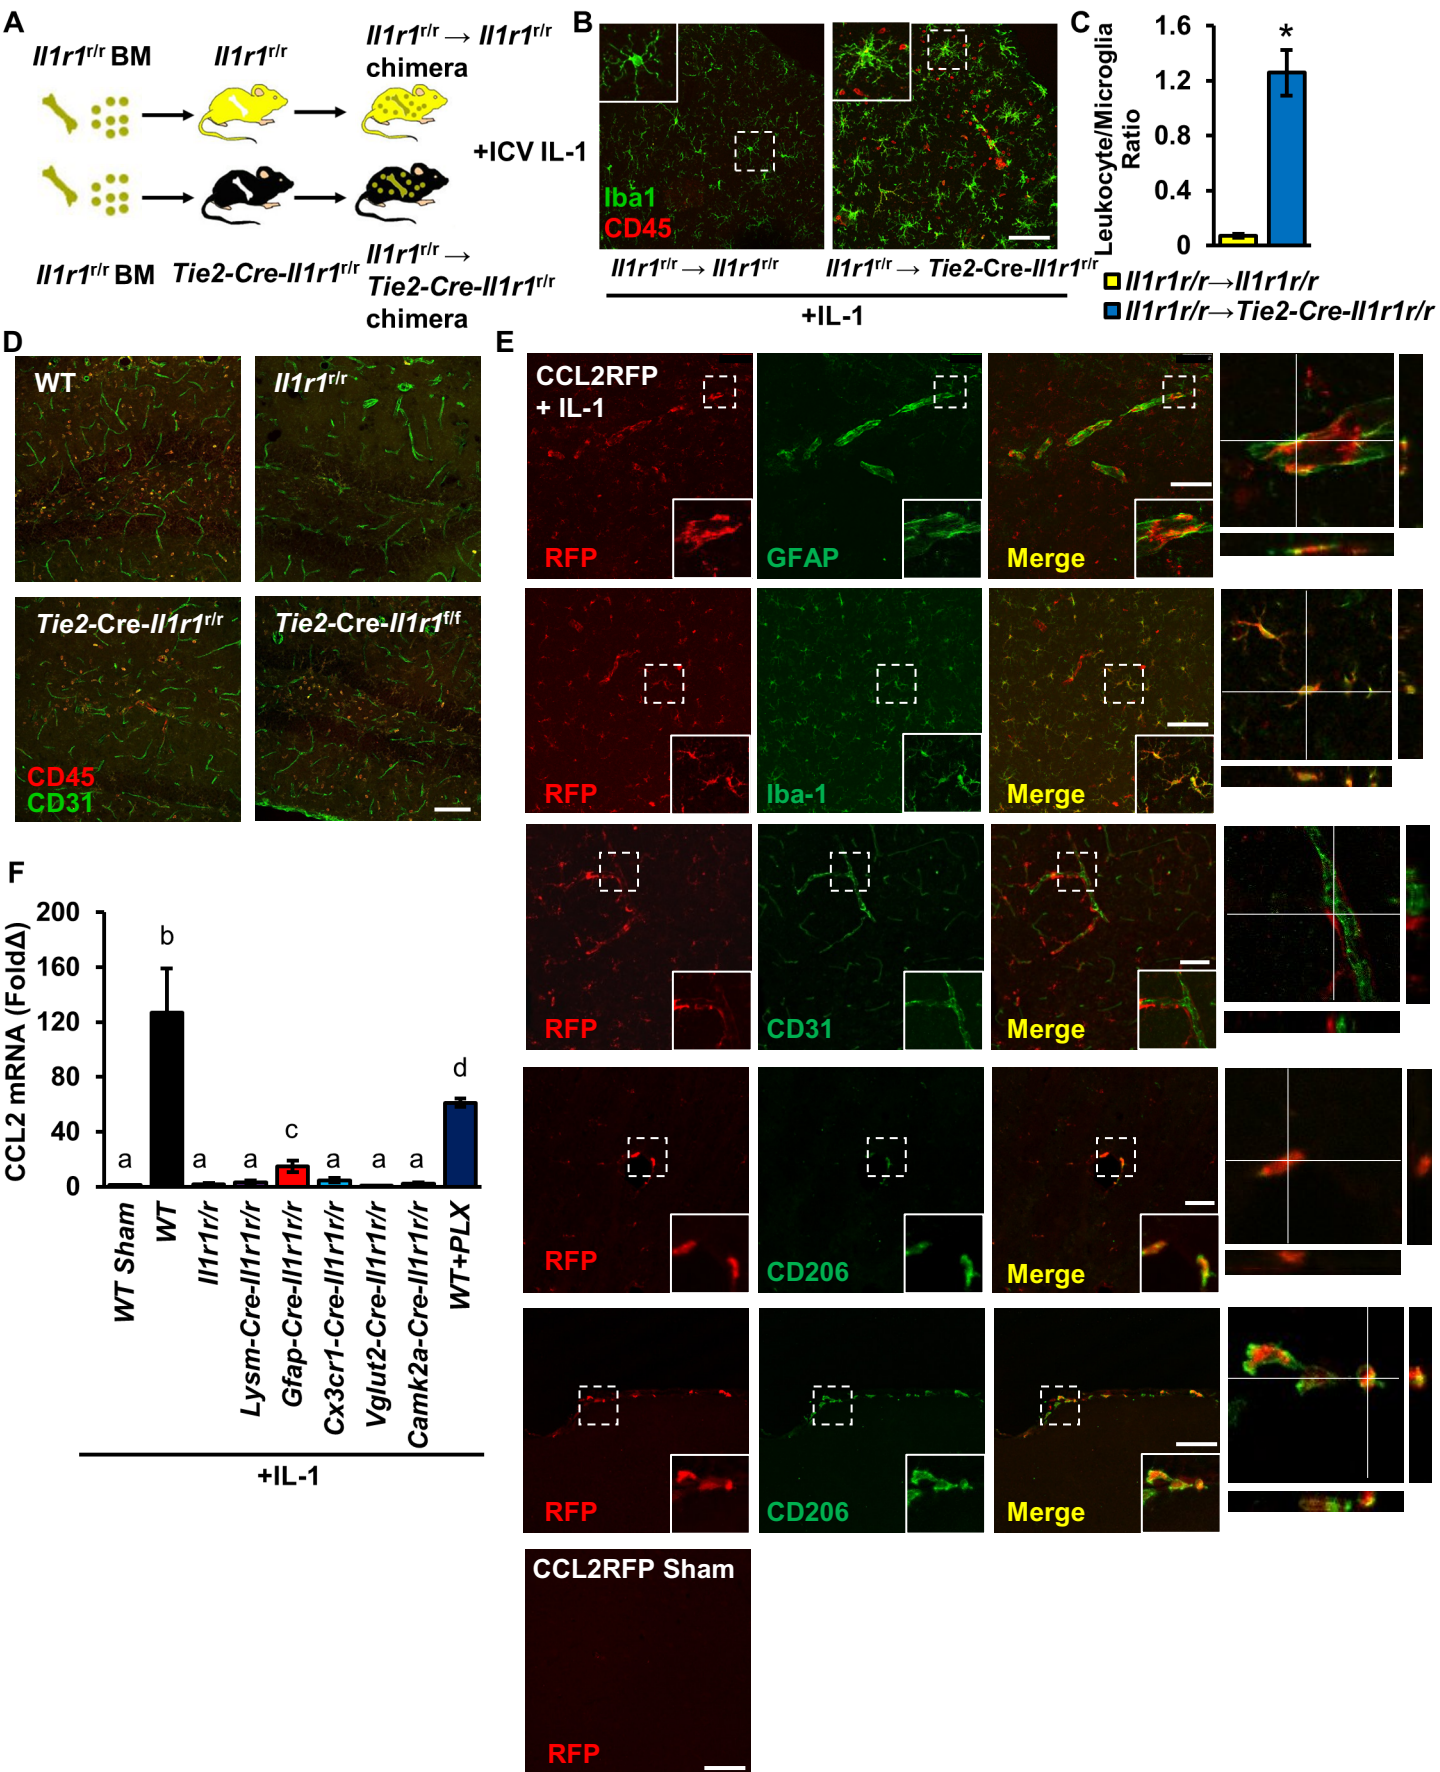

Figure S6

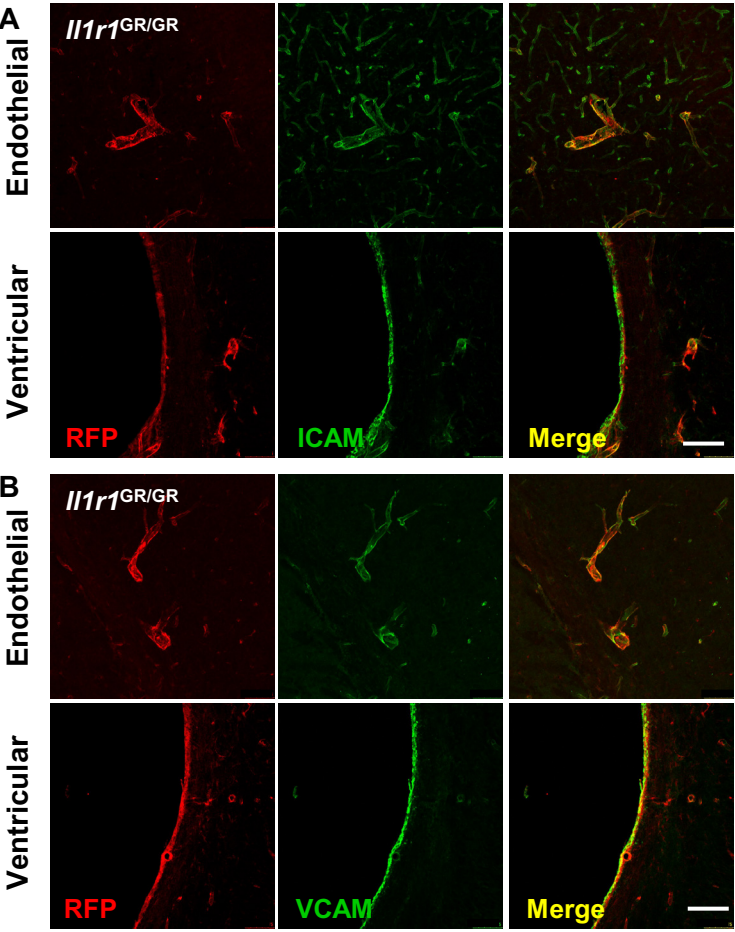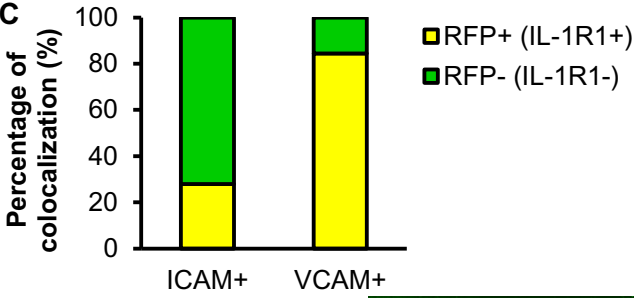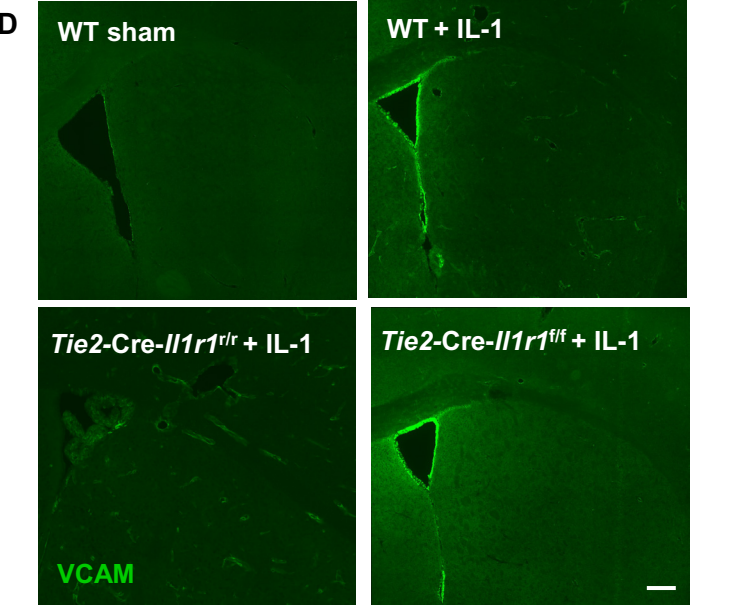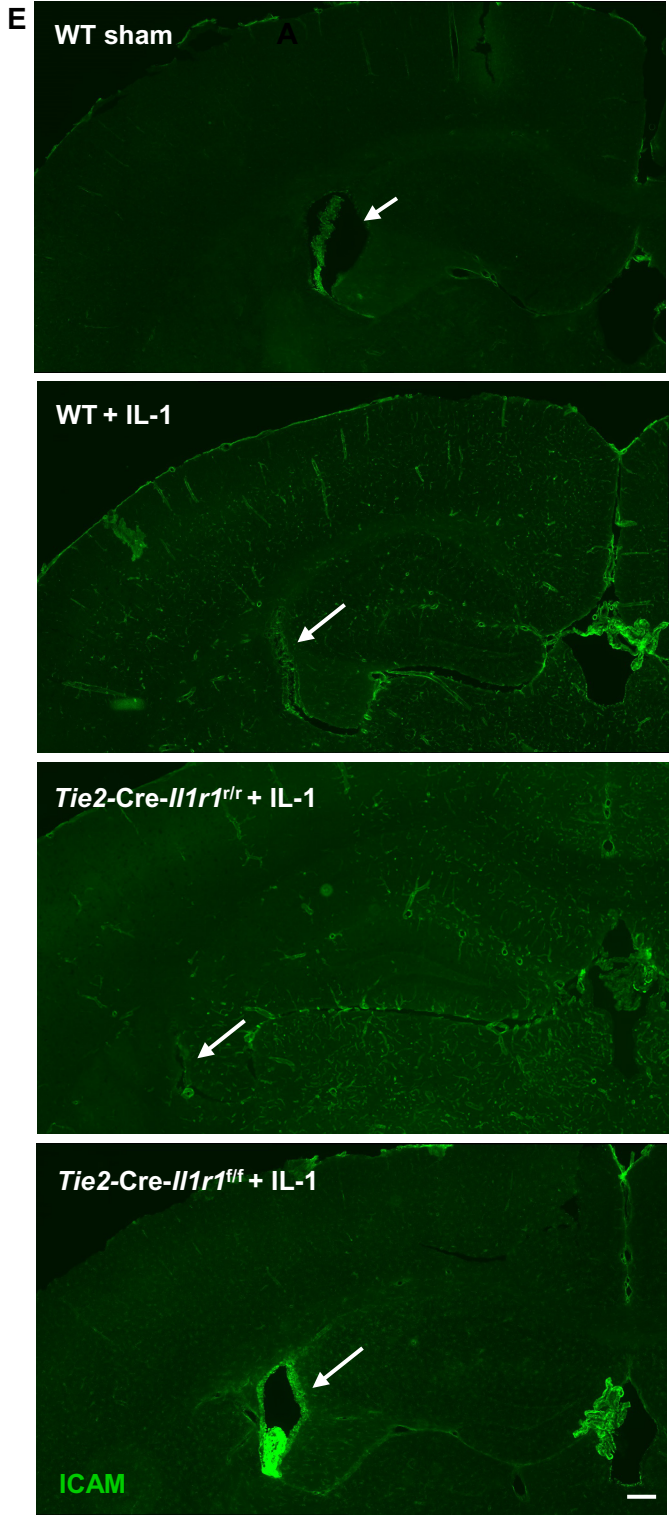

**Figure S7**

**A**

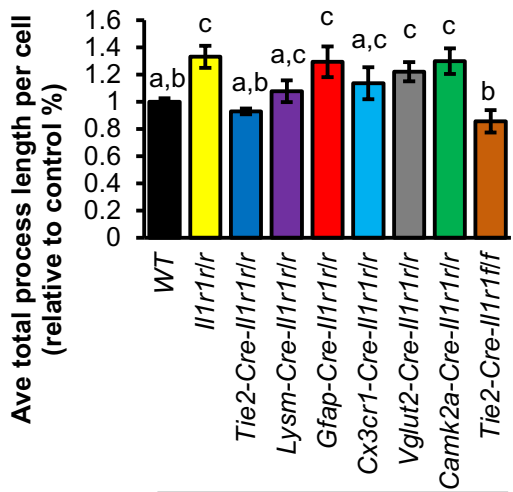

**B**

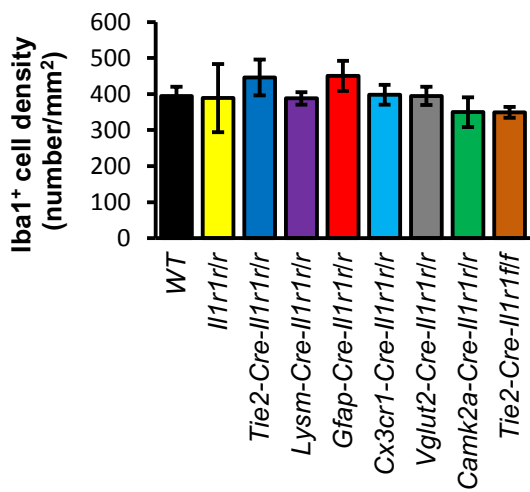

**C**

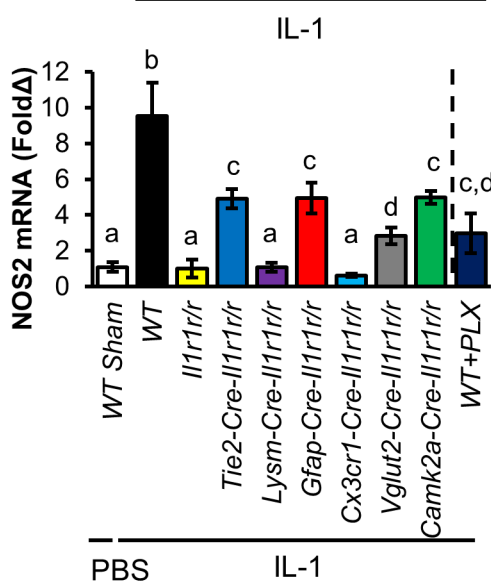

**D**

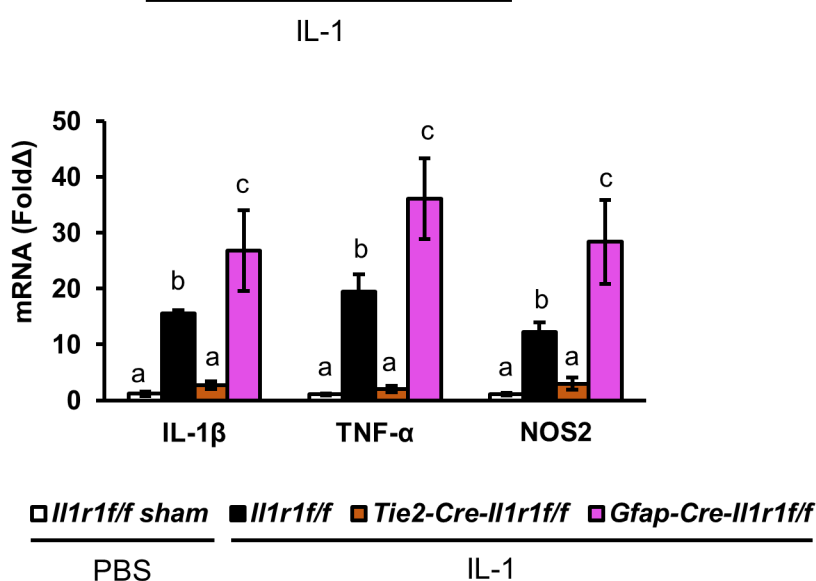

**E**

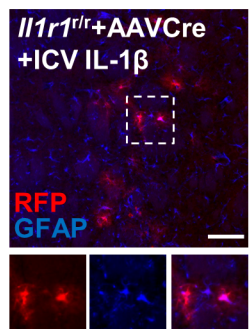

**F**

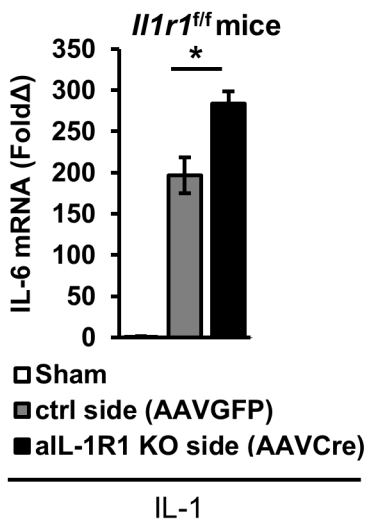

**G**

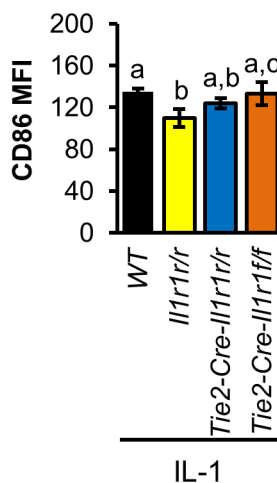

**H**

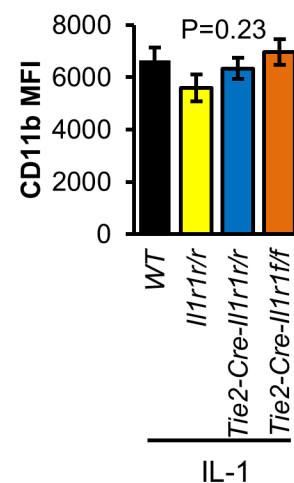

Supplement: NIHMS1050912-supplement-Supplemental.pdf [file NIHMS1050912-supplement-Supplemental.pdf]
